# Supplementary material
Source: Research Square preprint supplement (doi:10.21203/rs.3.rs-8465705/v1)
Supplement: Supplementary file 2 [file 62c60476a79a687ded3714a1.pdf]

**Table S2. Sequence of oligonucleotide primers.**

|                                                       |            |     |
|-------------------------------------------------------|------------|-----|
| PCR Primer: STING Fw:<br>CACCTCTATTCGCATTGTAGC        | This study | N/A |
| PCR Primer: STING Rv:<br>AGCCGTGAAAGTAGTTGGAG         | This study | N/A |
| PCR Primer: Cyp304a1 Fw:<br>CTTCATCCTGCGCTACTTA       | This study | N/A |
| PCR Primer: Cyp304a1 Rv:<br>CTTATCCACAAAGTCGGCA       | This study | N/A |
| PCR Primer: Vago Fw:<br>ATCAAAAACCTCGCAAGCT           | This study | N/A |
| PCR Primer: Vago Rv:<br>ACGCTTACCTATCCTCCC            | This study | N/A |
| PCR Primer: Srg3 Fw:<br>CTATGAACTGTCCTCGGA            | This study | N/A |
| PCR Primer: Srg3 Rv:<br>GCTGACGGTCCCTTCGAT            | This study | N/A |
| PCR Primer: Spn88Eb Fw:<br>CTCCTTCCCGTAGTAACCATAG     | This study | N/A |
| PCR Primer: Spn88Eb Rv:<br>TGTGCGTCTTATCGGCTA         | This study | N/A |
| PCR Primer: CG32368 Fw:<br>TACACATCGTGCAAAGACAACCTT   | This study | N/A |
| PCR Primer: CG32368 Rv:<br>AGGCATTTTAATCAAAAACCTGCAA  | This study | N/A |
| PCR Primer: CG17224 Fw:<br>TTCGGCGATGTTAGGGTAAG       | This study | N/A |
| PCR Primer: CG17224 Rv:<br>ATTGAAGGCATTTTTGCTGGC      | This study | N/A |
| PCR Primer: CG43064 Fw:<br>TGCTACCACAACAGAAGGG        | This study | N/A |
| PCR Primer: CG43064 Rv:<br>GTCGCGCAATATCCACAAAT       | This study | N/A |
| PCR Primer: CG17264 Fw:<br>CTCCAACCTGGAAACCCGATGGCACA | This study | N/A |
| PCR Primer: CG17264 Rv:<br>ACCTTTTCCCTGTCTGTTGTTGCGCC | This study | N/A |
| PCR Primer: Lectin37-Da Fw:<br>CGTTTCAAGGAAACCCGTAC   | This study | N/A |
| PCR Primer: Lectin37-Da Rv:<br>TTTCTGCTTTGGAGCCT      | This study | N/A |
| PCR Primer: LysX Fw:<br>ACAGTCTTTAGCCACGCAG           | This study | N/A |

|                                                    |            |     |
|----------------------------------------------------|------------|-----|
| PCR Primer: LysX Rv:<br>GGACCTTTAGGGCACATCTT       | This study | N/A |
| PCR Primer: CG14499 Fw:<br>CAAGATGTTGTCGACCAAG     | This study | N/A |
| PCR Primer: CG14499 Rv:<br>TCGCTCATTGTGGTCCCTT     | This study | N/A |
| PCR Primer: Srg2 Fw:<br>TTCAAGATCAGAACCTGTCCG      | This study | N/A |
| PCR Primer: Srg2 Rv:<br>GACGGTCACCAACACTGAAGA      | This study | N/A |
| PCR Primer: CG7763 Fw:<br>TTTTTGGTACTCCCGTTGTGTCTG | This study | N/A |
| PCR Primer: CG7763 Rv:<br>TATCCAAAGCATCGTGCCAGTTTA | This study | N/A |
| PCR Primer: CG10814 Fw:<br>CAACCGCTTAAGTTGGCTCT    | This study | N/A |
| PCR Primer: CG10814 Rv:<br>GCAATCGAGCAGTTCTTGGT    | This study | N/A |
