# Supplementary material
Source: Research Square preprint supplement (doi:10.21203/rs.3.rs-8465705/v1)
Supplement: Supplementary file 3 [file f5be240f0e39f7a341c57a65.pdf]

**Table S1. Sequence of oligonucleotide primers.**

|                                                    |                           |     |
|----------------------------------------------------|---------------------------|-----|
| Q-PCR Primer: DCV Fw:<br>TCATCGGTATGCACATTGCT      | Hua Cai et al.,<br>2020   | N/A |
| Q-PCR Primer: DCV Rv:<br>CGCATAACCATGCTCTTCTG      | Hua Cai et al.,<br>2020   | N/A |
| Q-PCR Primer: CrPV Fw:<br>GCTGAAACGTTCAACGCATA     | Hua Cai et al.,<br>2020   | N/A |
| Q-PCR Primer: CrPV Rv:<br>CCACTTGCTCCATTTGGTTT     | Hua Cai et al.,<br>2020   | N/A |
| Q-PCR Primer: FHV Fw:<br>TTTAGAGCACATGCGTCCAG      | Hua Cai et al.,<br>2020   | N/A |
| Q-PCR Primer: FHV Rv:<br>CGCTCACTTTCTTCGGGTTA      | Hua Cai et al.,<br>2020   | N/A |
| Q-PCR Primer: VSV Fw:<br>CATGATCCTGCTCTTCGTCA      | Hua Cai et al.,<br>2020   | N/A |
| Q-PCR Primer: VSV Rv:<br>TGCAAGCCCGGTATCTTATC      | Hua Cai et al.,<br>2020   | N/A |
| Q-PCR Primer: STING Fw:<br>CCGGTGTCTATCGTCCTTTC    | Hua Cai et al.,<br>2020   | N/A |
| Q-PCR Primer: STING Rv:<br>CGCTTTAGTTCCTGCATCTG    | Hua Cai et al.,<br>2020   | N/A |
| Q-PCR Primer: Vago Fw:<br>TGCAACTCTGGGAGGATAGC     | Deddouche et<br>al., 2008 | N/A |
| Q-PCR Primer: Vago Rv:<br>AATTGCCCTGCGTCAGTTT      | Deddouche et<br>al., 2008 | N/A |
| Q-PCR Primer: CG10814 Fw:<br>ATCTGCCACAGACACTGAGTA | This Study                | N/A |
| Q-PCR Primer: CG10814 Rv:<br>CGGACCACTCTATACACAGGA | This Study                | N/A |
| Q-PCR Primer: srg1 Fw:<br>GTGTCCATTATCCGCACAAG     | Hua Cai et al.,<br>2020   | N/A |
| Q-PCR Primer: srg1 Rv:<br>ACTGGGGTATCTGACGGATG     | Hua Cai et al.,<br>2020   | N/A |
| Q-PCR Primer: srg2 Fw:<br>GCGTTTTGGCCCTTATTATG     | Hua Cai et al.,<br>2020   | N/A |
| Q-PCR Primer: srg2Rv:<br>CTTTTGTAGCCGACGCAGTG      | Hua Cai et al.,<br>2020   | N/A |
| Q-PCR Primer: srg3 Fw:<br>GCGACCGTCATTGGATTGG      | Hua Cai et al.,<br>2020   | N/A |
| Q-PCR Primer: srg3 Rv:<br>TGATGGTCCCGTTGATAGCC     | Hua Cai et al.,<br>2020   | N/A |
| Q-PCR Primer: RpL32 Fw:<br>GCCGCTTCAAGGGACAGTATCT  | Hua Cai et al.,<br>2020   | N/A |

|                                                     |                         |     |
|-----------------------------------------------------|-------------------------|-----|
| Q-PCR Primer: RpL32 Rv:<br>AAACGCGGTTCTGCATGAG      | Hua Cai et al.,<br>2020 | N/A |
| Q-PCR Primer: LysX Fw:<br>ACGACATGTACTGGTGCCAG      | This Study              | N/A |
| Q-PCR Primer: LysX Rv:<br>GAGCGTTGCAACTCACATCG      | This Study              | N/A |
| Q-PCR Primer: CG42807 Fw:<br>GCTTTCTGGGAGTAGCAATCAT | This Study              | N/A |
| Q-PCR Primer: CG42807 Rv:<br>GCTGTTTGATCTTCGCGTCATA | This Study              | N/A |
| Q-PCR Primer: esg Fw:<br>GTGGACTCGGACCCAAATCAG      | This Study              | N/A |
| Q-PCR Primer: esg Rv:<br>CCAGGGATATTTCGGGTATGTG     | This Study              | N/A |
|                                                     |                         |     |
